# Supplementary material for: Cardiovascular outcomes of type 2 diabetic patients treated with SGLT-2 inhibitors versus GLP-1 receptor agonists in real-life
Source: PubMed Central journal article supplement — BMJ Open Diabetes Res Care. 2020 Jun 25;8(1):e001451. doi: 10.1136/bmjdrc-2020-001451 (PMC7319723; doi:10.1136/bmjdrc-2020-001451), 2020-06-25
Supplement: bmjdrc-2020-001451supp001.pdf [file bmjdrc-2020-001451supp001.pdf]

1

## Online Data Supplement

**Figure S1.** Kaplan-Meier curves. Comparison of event-free survival over time. Only outcomes associated with statistically significant log-rank test p-values (“p” in the Figure) are shown. MACE denotes major adverse cardiovascular events. 3P-MACE is a combination of all-cause death, myocardial infarction, stroke. Hospitalization for CVD refers to all hospitalization for cardiovascular causes. SGLT2i, SGLT-2 inhibitors. GLP-1RA, GLP-1 receptor agonists.

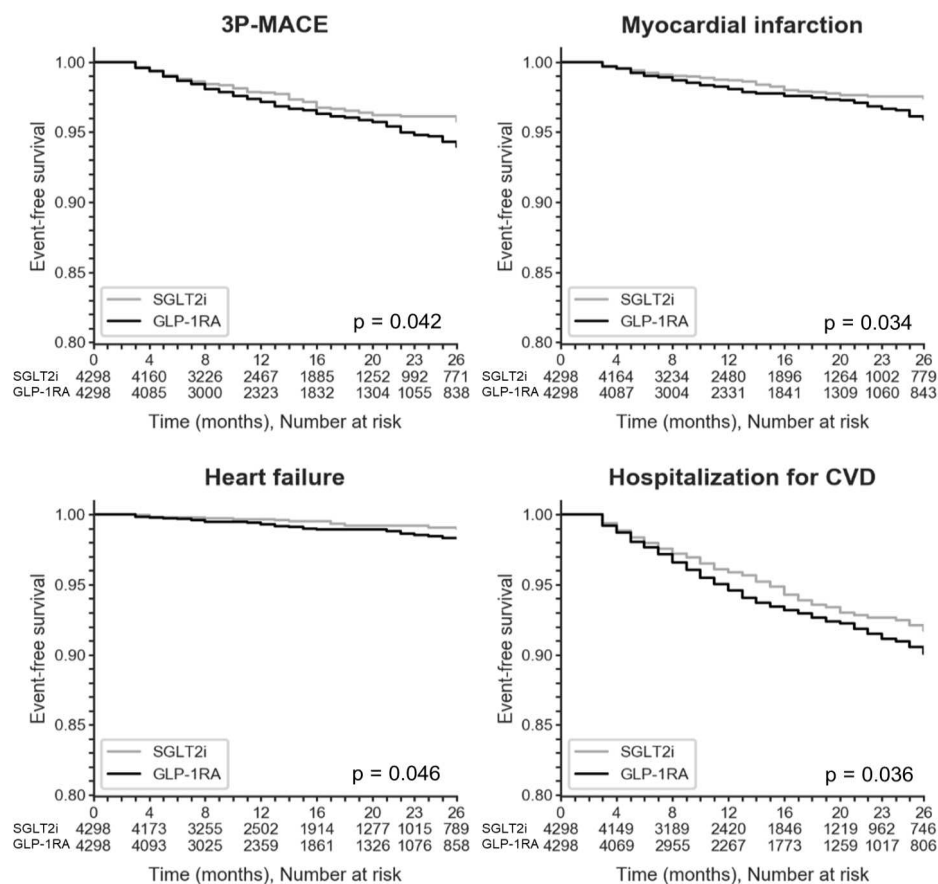

1

**Figure S2.** Subgroup analysis for the primary outcome. Results of Cox analysis on the primary outcome, after stratification according to the indicated variables. In the figure, “p int.” refers to the interaction term (SGLT2i or GLP-1RA × stratification variable) in the adjusted model.

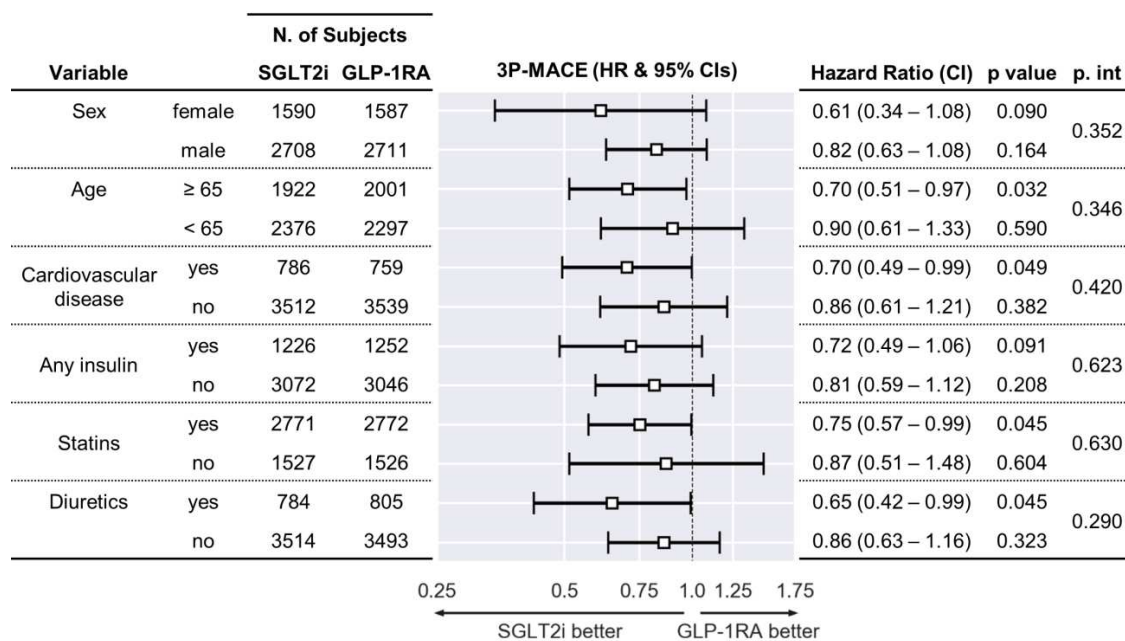

**Figure S3. Subgroup analysis stratified by type of GLP-1RA.** Results of Cox analysis on the primary outcome, after stratification of GLP-1RA initiators according to whether they were on human- or exendin-based GLP-1RA

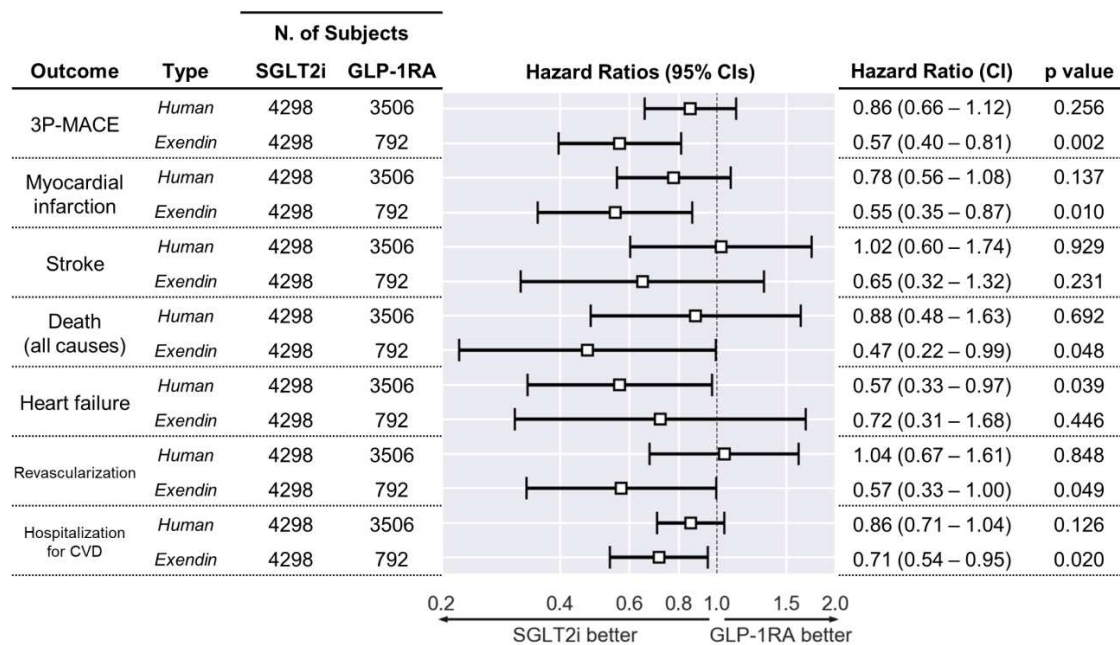

4

**Figure S4. Balance before and after matching.** Visual representation of absolute standardised mean differences before and after PSM. The vertical, dashed line represents the 0.10 threshold.

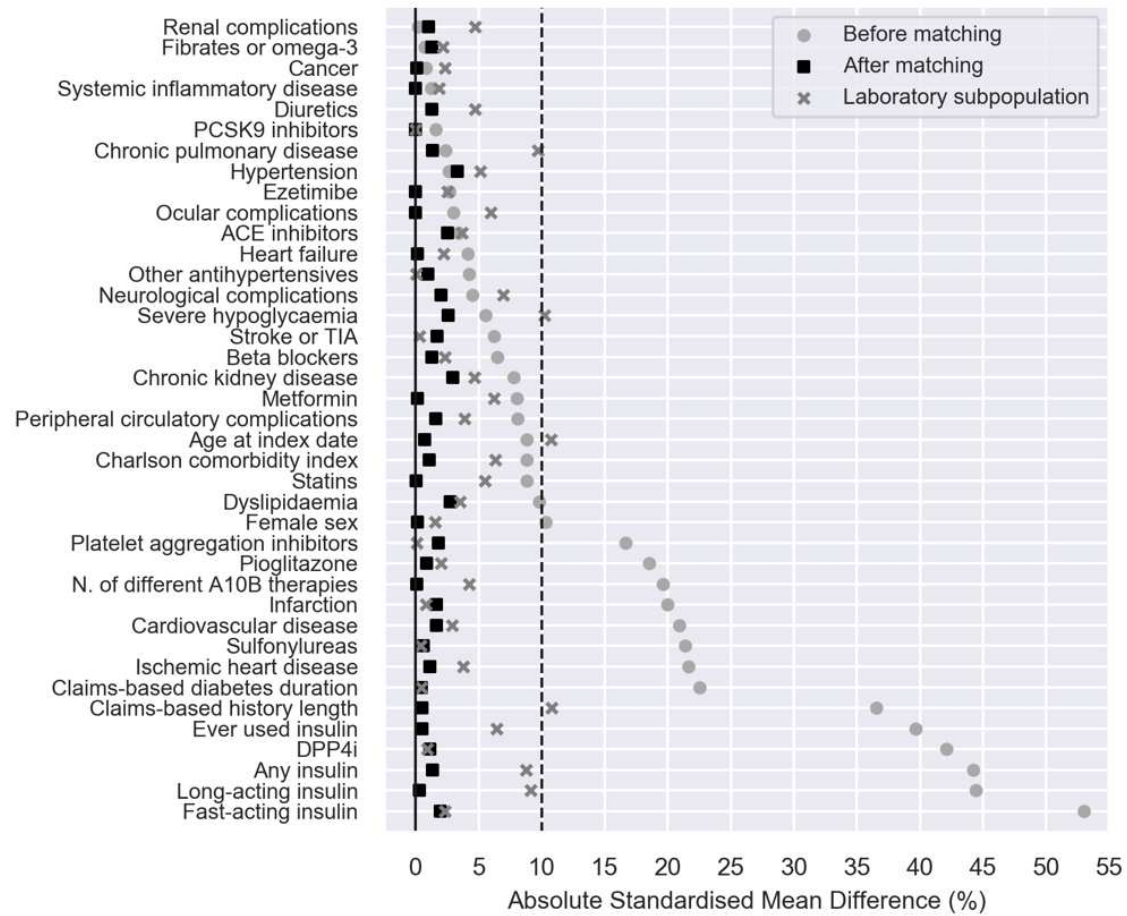

4

**Table S1. Claims-based definition of study variables.** Each variable was defined as the presence of at least one of the claims-based indicators in the corresponding row. Medication names have been internally mapped 1:1 to ATC codes, exemptions from copayment to regional exemption codes.

| Variable                                | ICD-9-CM<br>Diagnosis<br>Codes | ICD-9-CM<br>Procedure<br>Codes                                                                              | Medications                                                             | Exemptions<br>from Copayment                               |
|-----------------------------------------|--------------------------------|-------------------------------------------------------------------------------------------------------------|-------------------------------------------------------------------------|------------------------------------------------------------|
| Hypertension                            | 401-405                        |                                                                                                             | ACE inhibitors,<br>diuretics, beta blockers,<br>other antihypertensives | Hypertension                                               |
| Dyslipidaemia                           |                                |                                                                                                             | Statins, fibrates, omega<br>3, PCSK9 inhibitors,<br>ezetimibe           | Dyslipidaemia                                              |
| Peripheral circulatory<br>complications | 440, 250.7                     | 00.55, 38.48,<br>39.50, 39.52,<br>39.71, 39.90                                                              |                                                                         |                                                            |
| Myocardial Infarction                   | 410-414                        |                                                                                                             |                                                                         |                                                            |
| Ischemic heart disease                  | 410-414                        | 00.66, 36.03,<br>36.06, 36.07,<br>36.10, 36.19                                                              |                                                                         | Ischemic heart<br>disease                                  |
| Stroke or TIA                           | 431-436                        | 00.61-00.65                                                                                                 |                                                                         | Stroke or TIA                                              |
| Heart failure                           | 428                            |                                                                                                             |                                                                         | Heart failure                                              |
| Cardiovascular disease                  | 410-414, 428,<br>431-436, 440  | 00.55, 00.61-<br>00.66, 36.03,<br>36.06, 36.07,<br>36.10, 36.19,<br>38.48, 39.50,<br>39.52, 39.71,<br>39.90 |                                                                         | Ischemic heart<br>disease, stroke or<br>TIA, heart failure |
| Neurological<br>complications           | 250.6                          |                                                                                                             |                                                                         |                                                            |
| Ocular complications                    | 250.5                          |                                                                                                             |                                                                         |                                                            |
| Renal complications                     | 250.4                          |                                                                                                             |                                                                         |                                                            |
| Chronic kidney disease                  | 585-587                        |                                                                                                             |                                                                         | Chronic kidney<br>disease                                  |

|                                      |                                    |  |                                             |                                                                                                                                      |
|--------------------------------------|------------------------------------|--|---------------------------------------------|--------------------------------------------------------------------------------------------------------------------------------------|
| <b>Severe hypoglycaemia</b>          | 250.3, 250.8,<br>250.10,<br>250.12 |  |                                             |                                                                                                                                      |
| <b>Chronic pulmonary disease</b>     | 491-496,<br>518.83,<br>518.84      |  | Medications for obstructive airway diseases | Chronic pulmonary disease, asthma                                                                                                    |
| <b>Systemic inflammatory disease</b> |                                    |  |                                             | Rheumatoid arthritis, systemic lupus erythematosus, connective tissue disease, Sjogren's syndrome, psoriasis, ankylosing spondylitis |
| <b>Cancer</b>                        |                                    |  |                                             | Cancer                                                                                                                               |

**Table S2. Baseline clinical characteristics before matching.** Unless otherwise indicated, medication-related variables were calculated starting from 12 months before the index date. Pre-existing conditions were assessed with all available data up to the index date. SMD values reported as “<0.01” are, in fact, <0.01 and >-0.01.

|                                                      | SGLT2i (N=7192) | GLP-1RA (N=5804) | SMD*  | p value** |
|------------------------------------------------------|-----------------|------------------|-------|-----------|
| <b>Demographics</b>                                  |                 |                  |       |           |
| Age at index date (years)                            | 63.2 (9.1)      | 62.4 (9.7)       | 0.09  | <0.001    |
| Female sex (%)                                       | 34.6            | 39.6             | -0.10 | <0.001    |
| Claims-based history length <sup>a</sup> (months)    | 62.2 (11.5)     | 57.3 (15.5)      | 0.37  | <0.001    |
| Claims-based diabetes duration <sup>b</sup> (months) | 126 (68.6)      | 111 (64.6)       | 0.23  | <0.001    |
| <b>Risk factors</b>                                  |                 |                  |       |           |
| Hypertension (%)                                     | 82.9            | 83.9             | -0.03 | 0.146     |
| Dyslipidaemia (%)                                    | 77.7            | 73.5             | 0.10  | <0.001    |
| <b>Macrovascular complications</b>                   |                 |                  |       |           |
| Peripheral circulatory complications (%)             | 3.2             | 1.9              | 0.08  | <0.001    |
| Infarction (%)                                       | 12.4            | 6.5              | 0.20  | <0.001    |
| Ischemic heart disease (%)                           | 18.8            | 11               | 0.22  | <0.001    |
| Stroke or TIA (%)                                    | 5.0             | 3.8              | 0.06  | 0.001     |
| Heart failure (%)                                    | 3.5             | 2.7              | 0.04  | 0.022     |
| Cardiovascular disease (%)                           | 24.1            | 15.8             | 0.21  | <0.001    |
| <b>Microvascular complications</b>                   |                 |                  |       |           |
| Neurological complications (%)                       | 0.7             | 0.3              | 0.04  | 0.016     |
| Ocular complications (%)                             | 0.7             | 0.5              | 0.03  | 0.113     |
| Renal complications (%)                              | 0.4             | 0.4              | <0.01 | 0.986     |
| Chronic kidney disease (%)                           | 1.3             | 2.3              | -0.08 | <0.001    |
| Severe hypoglycaemia (%)                             | 1.5             | 0.9              | 0.06  | 0.002     |
| <b>Comorbidities</b>                                 |                 |                  |       |           |
| Chronic pulmonary disease (%)                        | 34.1            | 33.0             | 0.02  | 0.185     |
| Systemic inflammatory disease (%)                    | 2.1             | 2.3              | -0.01 | 0.516     |
| Cancer (%)                                           | 10.5            | 10.8             | -0.01 | 0.676     |
| Charlson comorbidity index                           | 0.6 (1.2)       | 0.5 (1.1)        | 0.09  | <0.001    |
| <b>Glucose lowering medications</b>                  |                 |                  |       |           |
| No. of different A10B therapies <sup>c</sup>         | 2.2 (1.2)       | 2.4 (1.3)        | -0.20 | <0.001    |
| Ever used insulin (%)                                | 49.2            | 30               | 0.40  | <0.001    |
| Any insulin (%)                                      | 45.3            | 24.6             | 0.44  | <0.001    |
| Long-acting insulin (%)                              | 44.4            | 23.6             | 0.44  | <0.001    |
| Fast-acting insulin (%)                              | 31.7            | 10.4             | 0.53  | <0.001    |
| Metformin (%)                                        | 86.0            | 88.7             | -0.08 | <0.001    |
| Sulfonylureas (%)                                    | 36.6            | 47.0             | -0.21 | <0.001    |
| DPP4i (%)                                            | 21.0            | 39.8             | -0.42 | <0.001    |
| Pioglitazone (%)                                     | 9.3             | 15.2             | -0.18 | <0.001    |
| <b>Other therapies</b>                               |                 |                  |       |           |
| ACE inhibitors (%)                                   | 70.9            | 72.4             | -0.03 | 0.055     |
| Diuretics (%)                                        | 19.3            | 19.8             | -0.01 | 0.473     |
| Beta blockers (%)                                    | 38.6            | 35.5             | 0.06  | <0.001    |
| Other antihypertensives (%)                          | 7.7             | 8.9              | -0.04 | 0.018     |
| Statins (%)                                          | 67.8            | 63.7             | 0.09  | <0.001    |
| Fibrates or omega-3 (%)                              | 12.9            | 12.6             | 0.01  | 0.713     |
| PCSK9 inhibitors (%)                                 | 0.01            | 0                | 0.02  | 0.914     |
| Ezetimibe (%)                                        | 4.4             | 3.9              | 0.03  | 0.141     |
| Platelet aggregation inhibitors (%)                  | 41.7            | 33.6             | 0.17  | <0.001    |

\* Standardised mean differences (positive if SGLT2i greater). \*\* Chi-squared test for categorical variables (expressed as %), Mann-Whitney test otherwise. <sup>a</sup> time interval between the first available claim and the index date. <sup>b</sup> time interval between the first claim or exemption from co-payment indicating diabetes and the index date. <sup>c</sup> computed using all available data up to the index date.

**Table S3. Change in intermediate effectiveness parameters.** Clinical-laboratory data of patients with available values at baseline and during follow-up. Data are reported as mean (standard deviation). SBP, systolic blood pressure. DBP, diastolic blood pressure. \*p<0.05 vs. baseline. #p<0.05 vs. SGLT2i. ^p<0.05 vs. SGLT2i adjusted for baseline imbalance.

| Variable                        | SGLT2i       |               |              | GLP-1RA                   |               |                           |
|---------------------------------|--------------|---------------|--------------|---------------------------|---------------|---------------------------|
|                                 | Baseline     | Follow-up     | Change       | Baseline                  | Follow-up     | Change                    |
| <b>Fasting glucose, mg/dl</b>   | 169.7 (47.7) | 148.8 (37.7)* | -21.0 (49.8) | 161.6 (44.8) <sup>#</sup> | 147.8 (45.5)* | -13.8 (53.7) <sup>#</sup> |
| <b>HbA1c, %</b>                 | 8.0 (1.0)    | 7.6 (0.9)*    | -0.4 (1.0)   | 7.8 (0.9) <sup>#</sup>    | 7.3 (0.9)*    | -0.5 (1.0) <sup>^</sup>   |
| <b>SBP, mm Hg</b>               | 142.4 (20.3) | 137.1 (18.2)* | -5.3 (20.3)  | 143.3 (18.1)              | 141.1 (19.5)* | -2.2 (20.6) <sup>#</sup>  |
| <b>DBP, mm Hg</b>               | 81.7 (10.2)  | 79.8 (10.3)*  | -1.9 (10.3)  | 81.3 (10.1)               | 80.6 (10.4)   | -0.7 (10.9)               |
| <b>Total cholesterol, mg/dl</b> | 168.8 (37.0) | 162.2 (35.3)* | -6.6 (32.3)  | 169.2 (34.9)              | 160.2 (33.7)* | -9.0 (31.0)               |
| <b>HDL cholesterol, mg/dl</b>   | 47.9 (14.4)  | 49.5 (13.0)*  | 1.6 (9.7)    | 48.6 (13.0)               | 48.0 (12.5)   | -0.6 (8.1) <sup>#</sup>   |
| <b>LDL cholesterol, mg/dl</b>   | 93.8 (33.4)  | 87.2 (30.7)*  | -6.6 (28.2)  | 93.0 (30.7)               | 84.3 (28.6)*  | -8.6 (26.6)               |
| <b>Triglycerides, mg/dl</b>     | 134.5 (56.7) | 128.3 (53.2)* | -6.2 (50.8)  | 138.2 (56.1)              | 140.0 (58.3)  | 1.8 (50.9) <sup>#</sup>   |



**Table S4. Adverse events.** Results of Cox analysis on adverse events, and corresponding event rates (calculated /1000 person-years). HR are calculated for SGLT2i vs. GLP-1RA. GUTI, genitourinary tract infections.

|                              | SGLT2i |            | GLP-1RA |            | Total  |            | HR (CI)             | p value |
|------------------------------|--------|------------|---------|------------|--------|------------|---------------------|---------|
|                              | Events | Event rate | Events  | Event rate | Events | Event rate |                     |         |
| <b>GUTI</b>                  | 4      | 0.76       | 2       | 0.39       | 6      | 0.57       | 1.91 (0.35 – 10.41) | 0.456   |
| <b>Fournier's gangrene</b>   | 0      | 0.00       | 0       | 0.00       | 0      | 0.00       | N/A                 | N/A     |
| <b>Bone fracture</b>         | 26     | 4.92       | 23      | 4.44       | 49     | 4.68       | 1.10 (0.63 – 1.93)  | 0.73    |
| <b>Diabetic ketoacidosis</b> | 1      | 0.19       | 1       | 0.19       | 2      | 0.19       | 0.97 (0.06 – 15.56) | 0.985   |
| <b>Acute renal disease</b>   | 13     | 2.46       | 23      | 4.44       | 36     | 3.44       | 0.55 (0.28 – 1.09)  | 0.086   |
| <b>Amputation</b>            | 10     | 1.89       | 6       | 1.16       | 16     | 1.53       | 1.59 (0.58 – 4.37)  | 0.37    |
| <b>Pancreatitis</b>          | 4      | 0.76       | 2       | 0.39       | 6      | 0.57       | 1.98 (0.36 – 10.81) | 0.43    |
| <b>Pancreatic cancer</b>     | 9      | 1.7        | 6       | 1.16       | 15     | 1.43       | 1.45 (0.52 – 4.08)  | 0.48    |
